# Supplementary material for: Magnetic resonance imaging (MRI) of pharmacological ascorbate-induced iron redox state as a biomarker in subjects undergoing radio-chemotherapy
Source: PubMed Central journal article supplement — Redox Biol. 2020 Nov 19;38:101804. doi: 10.1016/j.redox.2020.101804 (PMC7708874; doi:10.1016/j.redox.2020.101804), 2020-11-19
Supplement: mmc1.pdf [file mmc1.pdf]

**Supplemental Data**  
**for**  
***Redox Biology***

<https://doi.org/10.1016/j.redox.2020.101804>

**Magnetic Resonance Imaging (MRI) of  
Pharmacological Ascorbate-Induced Iron Redox State  
as a Biomarker in Subjects Undergoing Radio-Chemotherapy**

Cameron M. Cushing<sup>1\*</sup>, Michael S. Petronek<sup>1\*</sup>, Kellie L. Bodeker<sup>1</sup>, Sandy Vollstedt<sup>1</sup>, Heather A. Brown<sup>1</sup>, Emyleigh Opat<sup>1</sup>, Nancy J. Hollenbeck<sup>1</sup>, Thomas Shanks<sup>1</sup>  
Daniel J. Berg<sup>2</sup>, Brian J. Smith<sup>5</sup>, Mark C. Smith<sup>1</sup>, Varun Monga<sup>2</sup>, Muhammad Furqan<sup>2</sup>, Matthew A. Howard<sup>6</sup>, Jeremy D. Greenlee<sup>6</sup>, Kranti A. Mapuskar<sup>1</sup>  
Joel St-Aubin<sup>1</sup>, Ryan T. Flynn<sup>1</sup>, Joseph J. Cullen<sup>4</sup>, Garry R. Buettner<sup>1</sup>, Douglas R. Spitz<sup>1</sup>  
John M. Buatti<sup>1</sup>, Bryan G. Allen<sup>1#</sup>, Vincent A. Magnotta<sup>3#</sup>,

1. Free Radical and Radiation Biology Program, Department of Radiation Oncology, Holden Comprehensive Cancer Center, University of Iowa Hospitals and Clinics (CMC, MSP, KLB, SV, HAB, EO, NH, TS, MCS, JSA, RTF, JJC, GRB, DRS, JMB, BGA)
2. Division of Hematology and Oncology, Department of Internal Medicine, Holden Comprehensive Cancer Center, University of Iowa Hospitals & Clinics, Iowa City, Iowa. (DJB, VM)
3. Department of Radiology, Holden Comprehensive Cancer Center, University of Iowa Hospitals and Clinics (VAM)
4. Department of Surgery, University of Iowa College of Medicine, Iowa City, Iowa. Department of Radiation Oncology, University of Iowa College of Medicine, Iowa City, Iowa. Holden Comprehensive Cancer Center, Iowa City, Iowa. Veterans Affairs Medical Center, Iowa City, Iowa. (JJC)
5. Department of Biostatistics, Holden Comprehensive Cancer Center, The University of Iowa, Iowa City, Iowa. (BJS)
6. Department of Neurosurgery, University of Iowa Hospitals & Clinics, Iowa City, Iowa. (MAH, JDG)

## Contents

**Page 2. Supplemental Figure 1. Clinical imaging protocol.**

**Page 3. Supplemental Figure 2. Time-course of mean  $T_2^*$  values.**

**Page 4. Supplemental Figure 3. Time-course of mean QSM values.**

**Page 5. Supplemental Figure 4.  $T_2^*$  relaxation times are selectively increased by P-AscH<sup>-</sup> in an orthotopic glioma model.**

**Supplemental Figure 1.**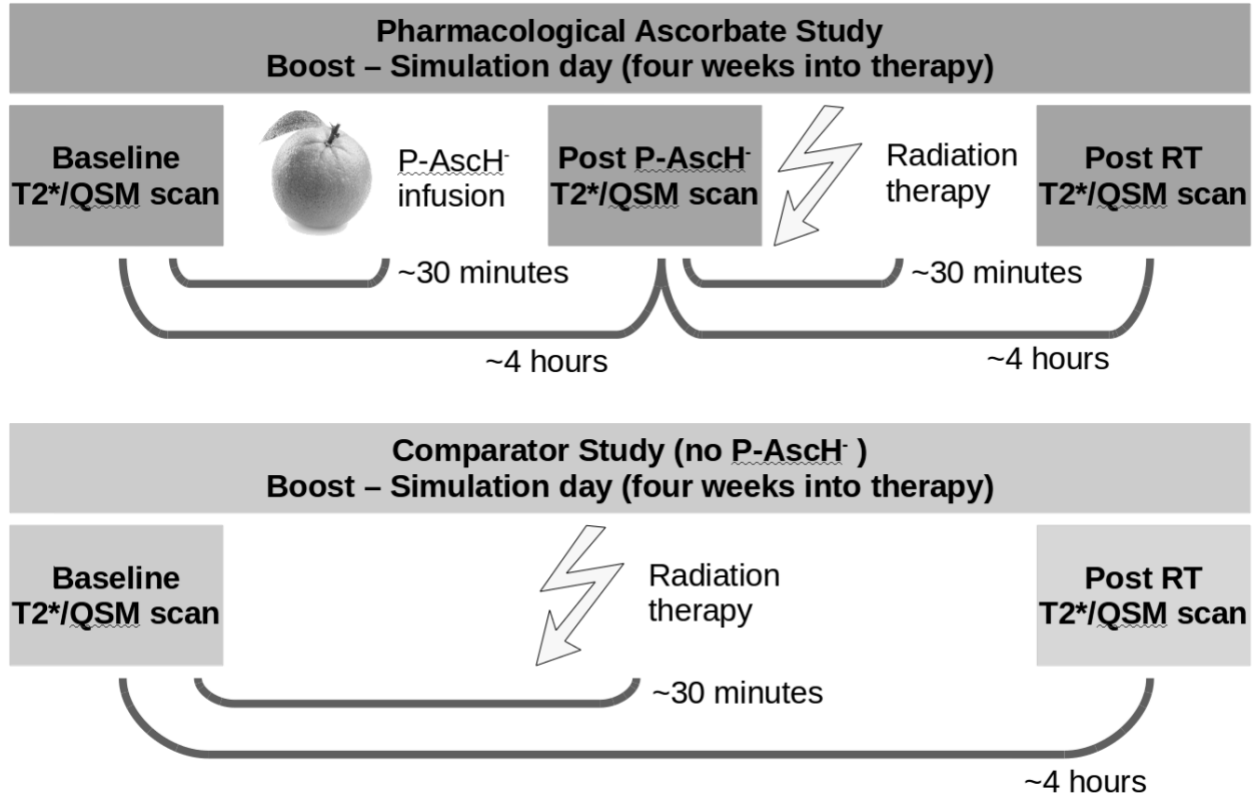**Supplemental Figure 1. Clinical imaging protocol.**

Subjects with confirmed glioblastoma were scanned at boost simulation (approximately 4 weeks into therapy) three times in a single day. Directly prior to P-AscH<sup>-</sup> therapy (timepoint 1) directly after P-AscH<sup>-</sup> and prior to radiation therapy (timepoint 2) and 4 hours post timepoint 2.

Comparator subjects not receiving ascorbate were scanned prior to and post radiation therapy.

**Supplemental Figure 2.****A. Tumor**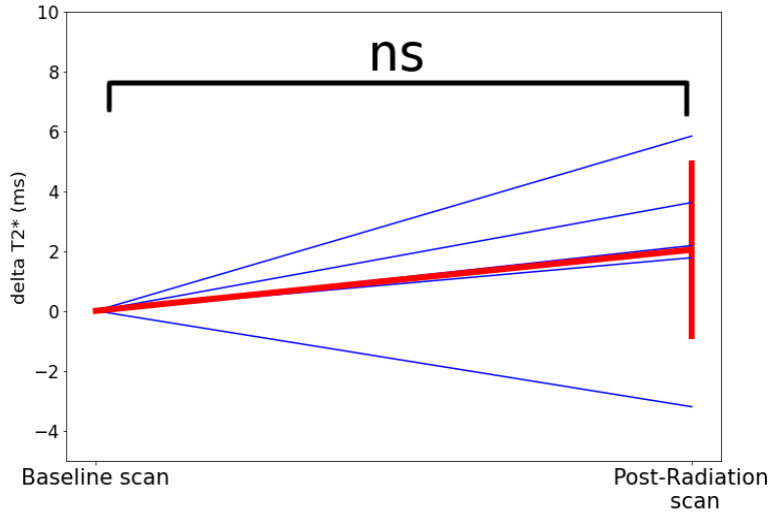**B. Normal Tissue**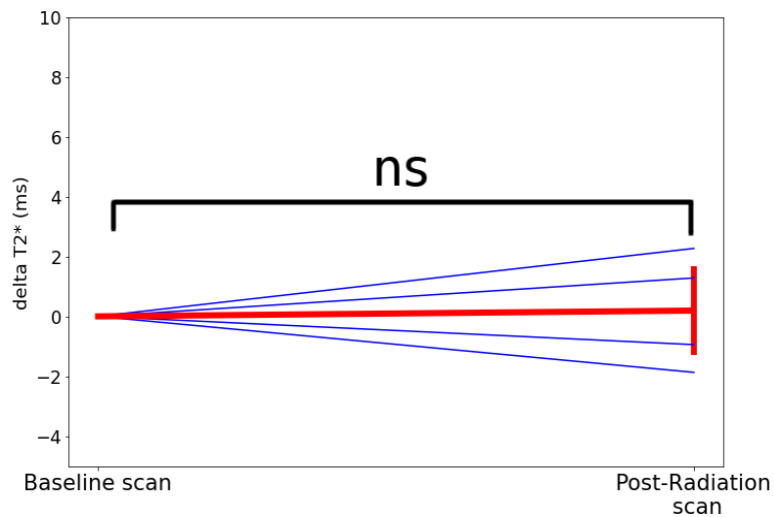**Supplemental Figure 2. Time-course of mean  $T_2^*$  values.**

Time-course of mean  $T_2^*$  values in the contrast enhancing region of tumors **(A)** and normal tissue **(B)** of comparator subjects receiving only radiation and temozolomide therapy show no statistically significant change in tumors ( $p = 0.22$ ) or normal tissue ( $p = 0.68$ ) post radiation therapy. Data are normalized per subject to the baseline scan.

**Supplemental Figure 3.****A. Tumor**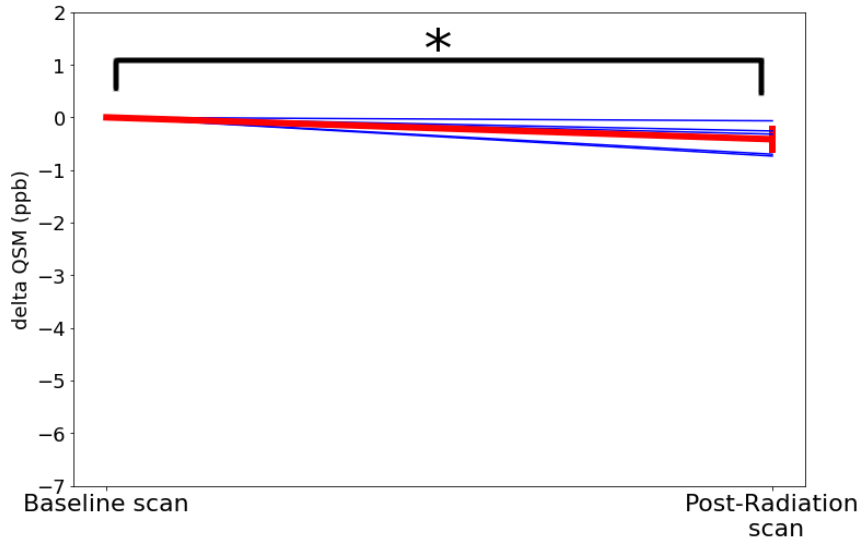**B. Normal Tissue**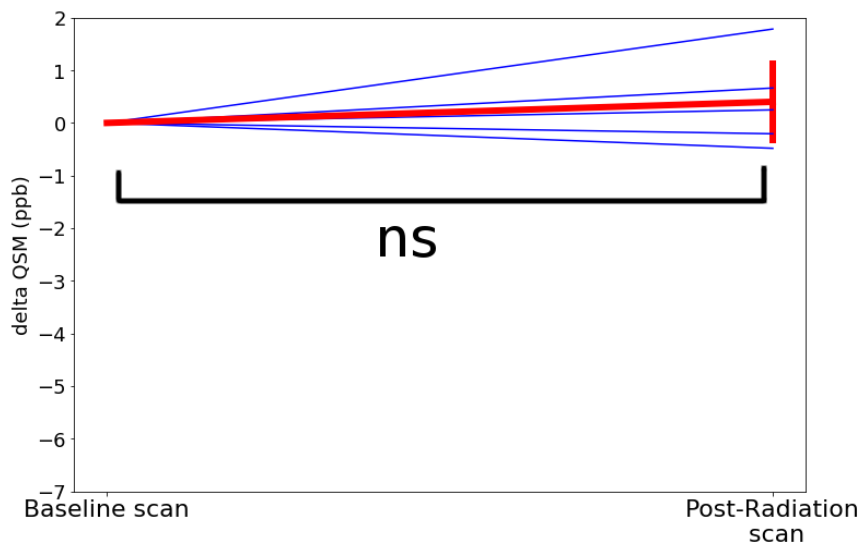**Supplemental Figure 3. Time-course of mean QSM values.**

Time course of mean QSM values in the tumors **(A)** and normal tissue **(B)** of comparator subjects receiving only standard of care therapy show a statistically significant decrease in tumors (-0.41 ppb,  $p = 0.04$ ) that is within measurement error and may therefore be artifactual. Normal tissue showed no statistically significant change ( $p = 0.68$ ). Data are normalized per subject to the baseline scan.

**Supplemental Figure 4.**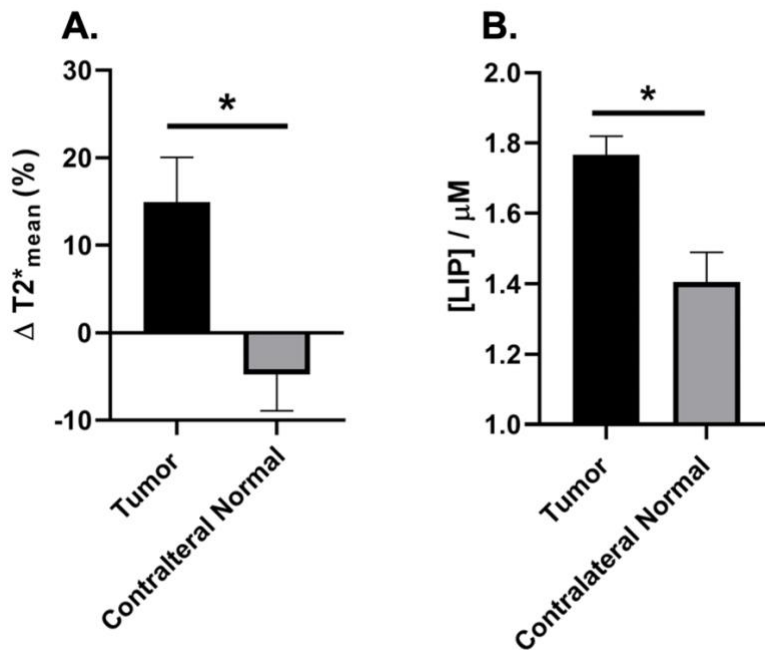**Supplemental Figure 4. T<sub>2</sub>\* relaxation times are selectively increased by P-AsCH<sup>-</sup> in an orthotopic glioma model.**

Mice with orthotopic U87 tumors were treated twice daily for 7 consecutive days with 4 g kg<sup>-1</sup> P-AsCH<sup>-</sup>. Animals were scanned immediately prior to the beginning of treatment as a baseline.

(A) The change (day 7 – day 0) in T<sub>2</sub>\* relaxation times associated with P-AsCH<sup>-</sup> treatment following 7 days of treatment.

(B) The LIP in associated tumor and contralateral normal tissue measured using EPR spectroscopy.

Error bars represent standard deviation of 3 replicate measurements. Groups were compared using a two-tailed, unpaired t-test with \**p* < 0.05.

End
